# Supplementary material for: Manipulating the formation of cesium lead bromide nanocrystals via oleic acid
Source: Royal Society of Chemistry journal article supplement (doi:10.1039/d2ra06491j), 2023-01-01
Supplement: d2ra06491j1.pdf [file d2ra06491j1.pdf]

Electronic Supplementary Information (ESI)

## Manipulating the Formation of Cesium Lead Bromide Nanocrystals via Oleic Acid

Miao Wang,<sup>a</sup> Qiyu Yu,<sup>\*bc</sup> Tian Yu,<sup>a</sup> Sijie Zhang,<sup>\*ad</sup> Min Gong<sup>a</sup> and Yuehui Liu<sup>c</sup>

<sup>a</sup>College of Physics, Sichuan University, Chengdu, 610065, China

<sup>b</sup>College of Material Science and Engineering, Sichuan University of Science and Engineering, Zigong, 643000, China

<sup>c</sup>Key Laboratory of Material Corrosion and Protection of Sichuan Province, Zigong, 643000, China

<sup>d</sup>School of Science, Guizhou University of Engineering Science, Guizhou, 551700, China

<sup>e</sup>Engineering Research Center in Biomaterials, Sichuan University, Chengdu, 610065, China

Corresponding Authors

[\\*yuqiyu2008@163.com](mailto:yuqiyu2008@163.com)

[\\*sijie.zhang@scu.edu.cn](mailto:sijie.zhang@scu.edu.cn)

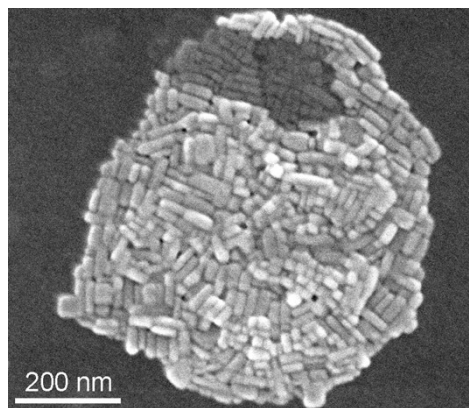

Fig. S1. Typical SEM images of as-prepared CsPbBr<sub>3</sub> nanorods.

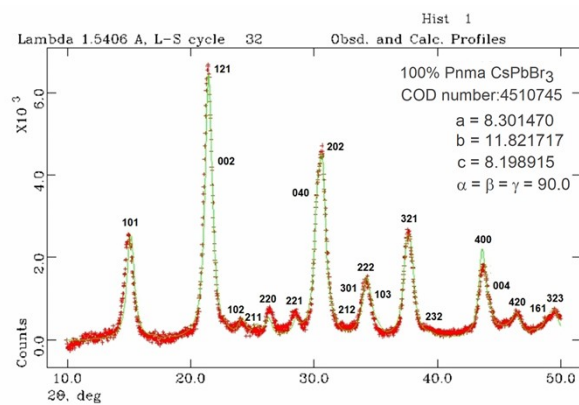

Fig. S2. Rietveld refinement analyses of the diffractograms acquired from the CsPbBr<sub>3</sub> nanorods.

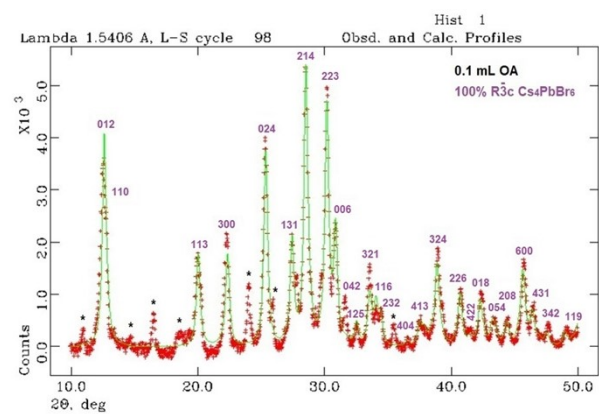

Fig. S3. Rietveld refinement analyses of the diffractograms acquired from the Cs<sub>4</sub>PbBr<sub>6</sub> nanocrystals.

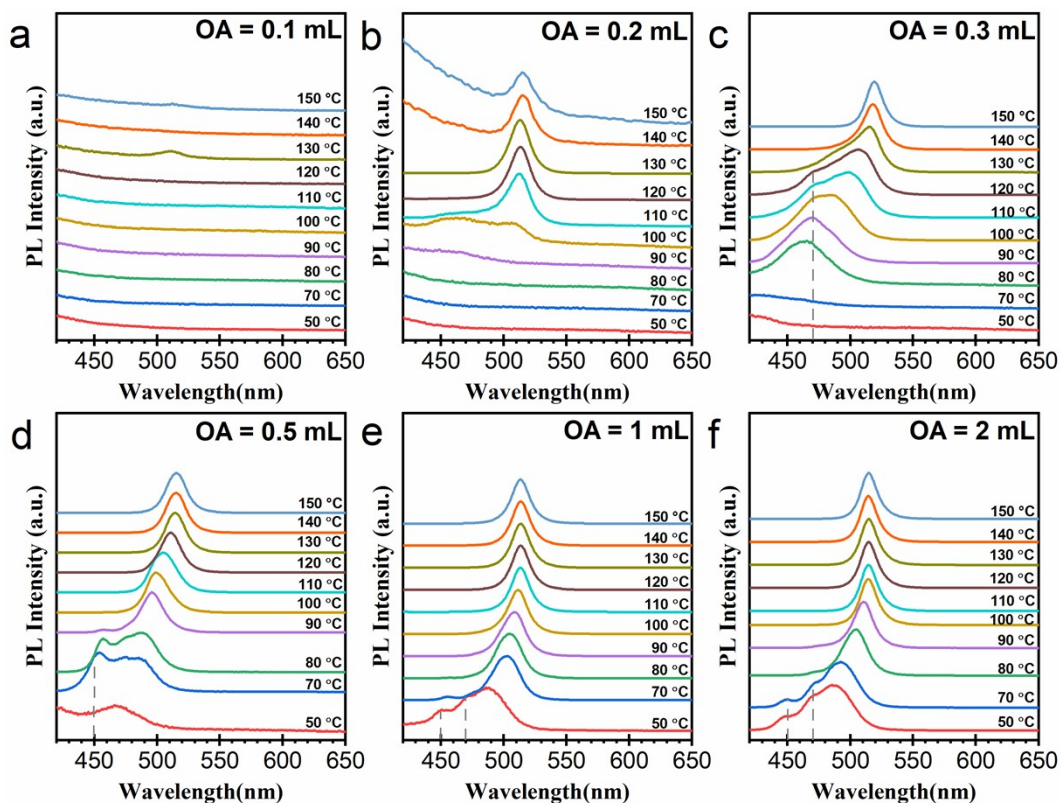

Fig. S4. Evolution of the photoluminescence (PL) spectra during heating up the reaction systems with OA amounts of (a) 0.1, (b) 0.2, (c) 0.3, (d) 0.5, (e) 1 and (f) 2 mL, respectively. Two kinds of PL signals around 450 and 470 nm were indicated (dashed lines), respectively.

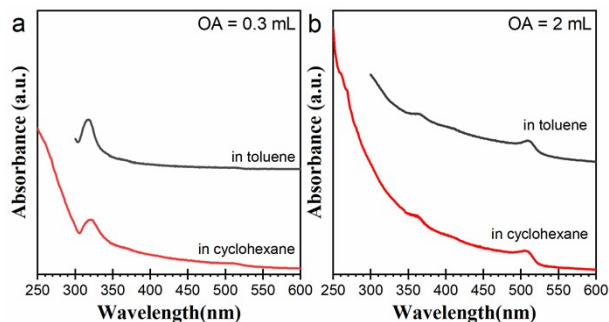

Fig. S5. UV-vis absorption spectra of CsPbBr<sub>3</sub> rude samples prepared in reaction systems with the OA amounts of (a) 0.3 and (b) 2 mL, respectively. The measurement was taken after the samples being diluted in toluene and cyclohexane, respectively.

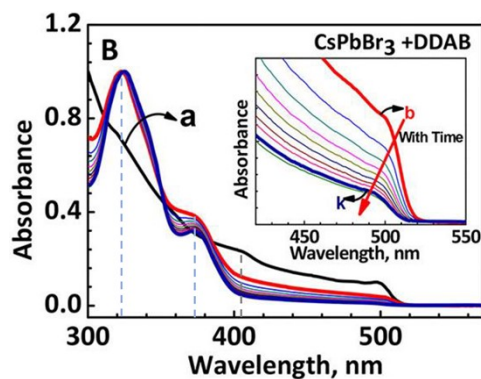

Fig. S6. Absorption spectra recorded after the addition of dodecyl dimethylammonium bromide (DDAB) to CsPbBr<sub>3</sub> NCs in toluene: (a) before adding DDAB and (b–k) after addition of DDAB. The magnified region of absorption at the band edge is shown in the inset. In curve a, an absorption signal near 400 nm was indicated (dashed grey line). In curves b–k, absorption signals near 320 nm and those between 360–370 nm were also indicated (dashed blue lines). Adapted with permission from ref 1. Copyright 2018 American Chemical Society.

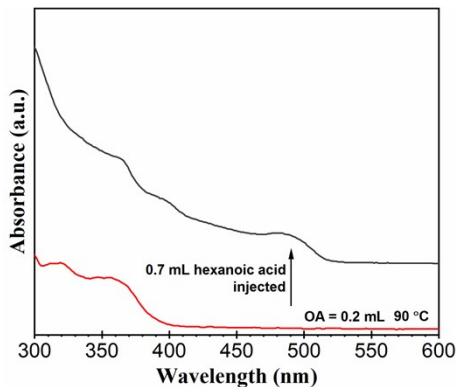

Fig. S7. Absorption spectra illustrating the generation of CsPbBr<sub>3</sub> NCs from lead bromide complex species upon hexanoic acid injection. A dispersion of lead bromide complex species was made with 0.2 mL of OA, followed by the addition of 0.7 mL of hexanoic acid. The spectra were collected before (red curve) and immediately after the injection of hexanoic acid (black curve).

1. Balakrishnan, S. K.; Kamat, P. V. *Chem. Mater.* **2018**, 30 (1), 74–78.
